# Supplementary material for: Isothiocyanate-Rich Extracts from Cauliflower (Brassica oleracea Var. Botrytis) and Radish (Raphanus sativus) Inhibited Metabolic Activity and Induced ROS in Selected Human HCT116 and HT-29 Colorectal Cancer Cells
Source: MDPI journal article supplement (doi:10.3390/ijerph192214919), 2022-11-13
Supplement: s1 [file s1]

Supplementary File

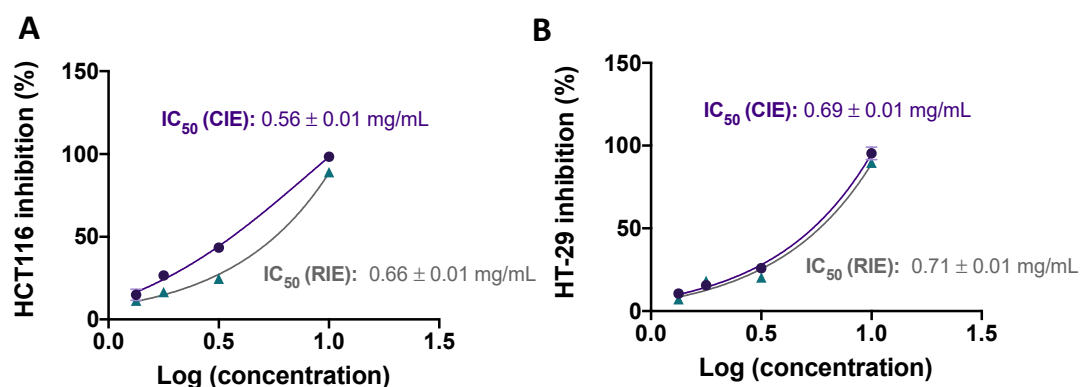

**Supplementary Figure S1.** Three parameters dose-response curves of CIE and RIE treatments for: (A) HCT116 and (B) HT29 cells.

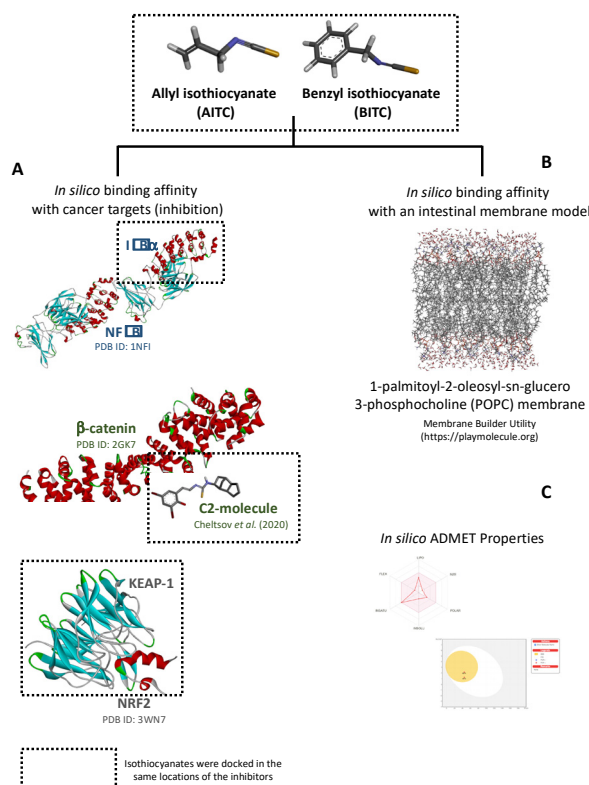

**Supplementary Figure S2.** Overall scheme of the *in silico* docking procedure.

Isothiocyanates (Allyl isothiocyanate of AITC; benzyl isothiocyanate of BITC) were downloaded from PubChem Database (AITC PubChem CID: 5971; BITC PubChem CID: 2346) and used as ligands, that were prepared in Discovery Studio Visualizer. Then, two *in silico* approaches were used: (A) ligands were docked in the same position of inhibitors from the cancer target molecules:  $IkB\alpha$ , C2-molecule, and KEAP-1, respectively for NF $\kappa$ B,  $\beta$ -catenin, and NRF2; (B) Ligands were docked in a simulation of intestinal permeation using a generated 1-palmitoyl-2-oleosyl-sn-glycero-3-phosphocholine (POPC) membrane, that was generated in the Membrane Builder utility from <https://playmolecule.org> (accessed on 18 September 2022); (C) The verification of the *in silico* ADMET properties of

the ligands was screened through bioinformatic utilities (admetSAR 2.0 and SwissADME online software).

**Supplementary Table S1.** Validation of HPLC method using for the identification and quantification of isothiocyanates.

| Standard Name | Detection Wavelength (nm) | RT (min) | Linearity Range (µg/mL) | Regression Coefficient (R <sup>2</sup> ) | LOD (µg/mL) | LOQ (µg/mL) |
|---------------|---------------------------|----------|-------------------------|------------------------------------------|-------------|-------------|
| AITC          | 240                       | 21.51    | 0-100                   | 0.991                                    | 2.05        | 2.24        |
| BITC          | 240                       | 37.85    | 0-100                   | 0.996                                    | 2.10        | 2.38        |

AITC: Allyl isothiocyanate; BITC: benzyl isothiocyanate; RT: retention time; LOD: Limit of detection; LOQ: limit of quantification.

**Supplementary Table S2.** Results from the recovery test of isothiocyanates.

| Standard Name | Amount Tested | Initial Amount (µg/ml) | Found Amount (µg/mL) | Recovery (%) | Average Recovery (%) | RSD (%) |
|---------------|---------------|------------------------|----------------------|--------------|----------------------|---------|
| AITC          | Low           | 15.20                  | 14.89                | 97.96        | 98.69                | 0.79    |
|               | Medium        | 35.71                  | 35.21                | 98.59        |                      |         |
|               | High          | 60.22                  | 59.93                | 99.52        |                      |         |
| BITC          | Low           | 14.90                  | 14.88                | 99.87        | 99.27                | 0.64    |
|               | Medium        | 40.23                  | 39.67                | 98.61        |                      |         |
|               | High          | 62.14                  | 61.72                | 99.32        |                      |         |

AITC: Allyl isothiocyanate; BITC: benzyl isothiocyanate; RSD: Relative standard deviation.
